# Supplementary material for: Characterization of dolomite and calcite microcalcifications in human breast tissue
Source: Royal Society of Chemistry journal article supplement (doi:10.1039/d4ra04137b), 2024-01-01
Supplement: d4ra04137b1.pdf [file d4ra04137b1.pdf]

## Supporting Information

### Characterization of dolomite and calcite microcalcifications in human breast tissue

Sahar Gal<sup>1</sup>, Mariela J. Pavan<sup>2</sup>, Netta Vidavsky<sup>1,2\*</sup>

<sup>1</sup>Department of Chemical Engineering, Ben-Gurion University of the Negev, Beer-Sheva 8410501, Israel

<sup>2</sup>Ilse Katz Institute for Nanoscale Science & Technology, Ben-Gurion University of the Negev, Beer-Sheva 8410501, Israel

\* Corresponding author, [nettav@bgu.ac.il](mailto:nettav@bgu.ac.il)

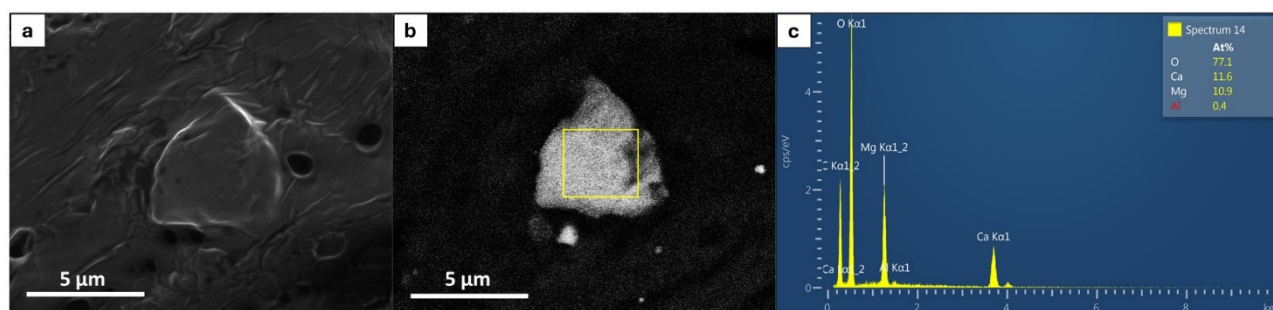

**Figure S1.** SEM image and EDS measurement of a single MC embedded in tumorous tissue of a patient with developed DCIS. (a) MC surface and surrounding tissue, imaged by secondary electron detection under low accelerating voltage (3 kV). (b) The same MC imaged by backscattered electron detection under high accelerating voltage (10 kV). The mineral particle is bright compared to the organic surroundings due to its high atomic number. (c) EDS analysis showing Ca and Mg atoms, and a lack of P atoms, indicating a non-CaP mineral. The Ca:Mg molar ratio is 1.06.

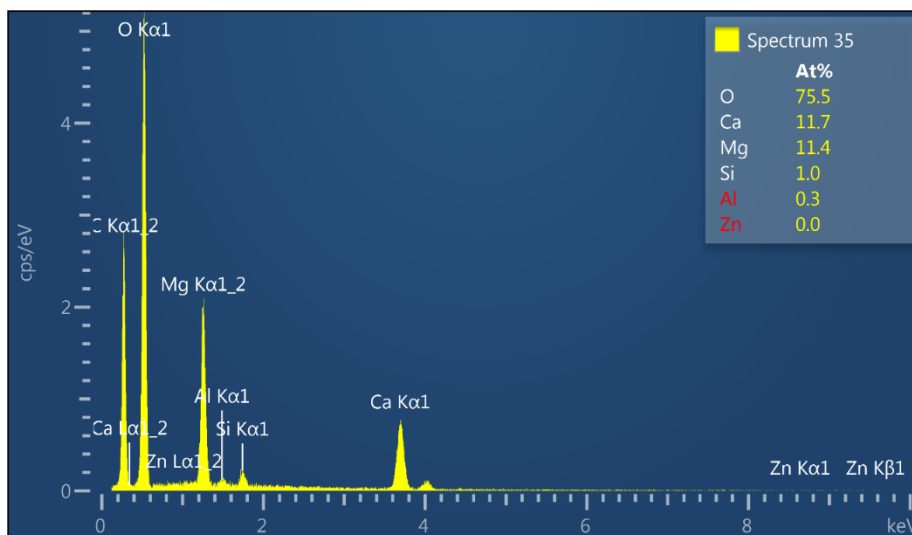

**Figure S2.** EDS measurements of the non-CaP MC shown in Fig. 4b.

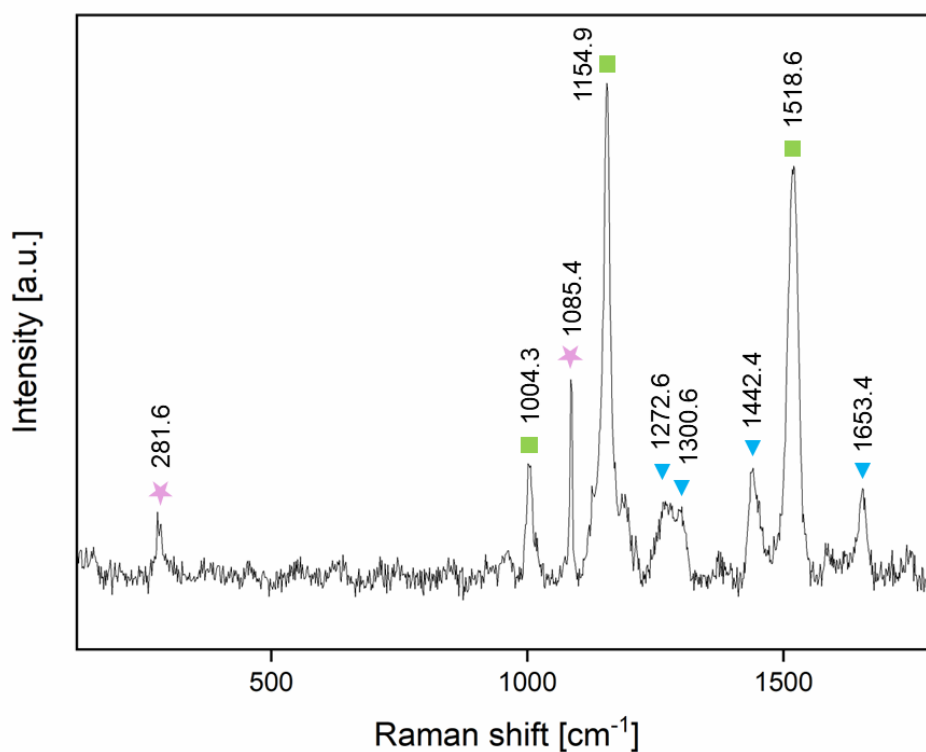

**Figure S3.** Raman spectrum of an MC with a 2.3  $\mu\text{m}$  diameter, showing calcite and organic material. Green square: carotene, blue arrowheads: lipids, pink star: calcite.

**Table S1.** Partial Clinical Data of the Participating DCIS Patients.

| patient number   | age (y) | height (m) | weight (kg) | BMI (kg/m <sup>2</sup> ) | smoking | procedure                                                           | collection date | clinical diagnosis and histologic type                                       | tumor size (cm) | Status |    |      |      | KI67 mitotic rate | alive? (Dec. 2021) | outcome (Dec. 2021)                                                                                                   |
|------------------|---------|------------|-------------|--------------------------|---------|---------------------------------------------------------------------|-----------------|------------------------------------------------------------------------------|-----------------|--------|----|------|------|-------------------|--------------------|-----------------------------------------------------------------------------------------------------------------------|
|                  |         |            |             |                          |         |                                                                     |                 |                                                                              |                 | ER     | PR | HER2 | BRCA |                   |                    |                                                                                                                       |
| <b>Patient 1</b> | 37      | 1.55       | 56          | 23.3                     | No      | mastectomy                                                          | July 2019       | left breast carcinoma with DCIS                                              | 2.5             | -      | -  | -    | -    | 80%               | yes                | Nov. 2019 - recurrence. 09/2020- Right breast U.S.: BIRADS 2                                                          |
| <b>Patient 2</b> | 56      | 1.68       | 80          | 28.3                     | No      | lumpectomy (without lymph node excision) + open right hemicolectomy | Jan. 2018       | ductal carcinoma, grade 3 + DCIS<br>Carcinoma of colon                       | 2.5             | +      | +  | -    | NA   | intermediate      | no                 | Treatment was given primarily for the colon disease. Metastatic colon cancer to the liver, abdominal cavity and bone. |
| <b>Patient 3</b> | 32      | 1.6        | 70          | 27.3                     | No      | lumpectomy                                                          | Mar. 2014       | breast carcinoma, DCIS + IDC3                                                | 2               | +      | +  | +    | -    | NA                | yes                | NED                                                                                                                   |
| <b>Patient 4</b> | 51      | 1.6        | 53          | 20.7                     | Yes     | lumpectomy + sentinel lymph node dissection                         | Sept. 2016      | IDC grade 2 + DCIS grade 3.<br>Malignant neoplasm of the breast, unspecified | 1.5             | +      | +  | +    | NA   | 20%               | yes                | NED                                                                                                                   |
| <b>Patient 5</b> | 62      | 1.73       | 65          | 21.7                     | No      | lumpectomy                                                          | Feb. 2017       | nonextensive intermediate grade dcis                                         | NA              | +      | +  | NA   | NA   | NA                | yes                | NED                                                                                                                   |
| <b>Patient 6</b> | 71      | 1.57       | 107         | 43.4                     | No      | lumpectomy                                                          | Mar. 2020       | DCIS grade 2.<br>Malignant neoplasm of breast, unspecified                   | 1               | +      | +  | -    | NA   | 3%                | yes                | NED                                                                                                                   |

NED= no evidence of disease.

**Table S2.** Peak Locations for the Calcite, Mg-Calcite, and Dolomite Raman Spectra Presented in Figure 6.

| <b>crystal type</b>  | <b>peak center (cm<sup>-1</sup>)</b> |
|----------------------|--------------------------------------|
| calcite MC           | 1085.4                               |
| commercial calcite   | 1085.7                               |
| biogenic Mg-calcite* | 1086.6                               |
| synthetic Mg-calcite | 1086.7                               |
| dolomite MC          | 1097.5                               |
| dolomite powder      | 1097.4                               |

\*From sea urchin tests
